# Supplementary material for: Label-free fluorescence polarization detection of pyrophosphate based on 0D/1D fast transformation of CdTe nanostructures
Source: Royal Society of Chemistry journal article supplement (doi:10.1039/c4an00266k), 2014-01-01
Supplement: c4an00266k1.pdf [file c4an00266k1.pdf]

**Electronic Supplementary Information**

**Label-Free Fluorescence Polarization Detection of Pyrophosphate Based on  
0D/1D Fast Transformation of CdTe Nanostructures**

Jinyan Du, Li Ye, Meili Ding, Yuting Chen, Shujuan Zhuo, Changqing Zhu\*

Key Laboratory of Functional Molecular Solids, Ministry of Education; Anhui Key

Laboratory of Chemo-Biosensing, College of Chemistry and Materials Science,

Anhui Normal University, Wuhu, 241000, PR China

[zhucq@mail.ahnu.edu.cn](mailto:zhucq@mail.ahnu.edu.cn)

**Fig. S1** (A) Change tendency of FP signals during the reversible transformation of 0D/1D CdTe nanostructures (green square represented NCs, whose polarization was derived from (B); red circle represented CdTe/Eu complex, whose polarization was derived from (C); blue triangle represented CdTe/Eu/PPI complex, whose polarization was derived from (D)); (B) Fluorescence intensity spectra of CdTe NCs solution; (C) Fluorescence intensity spectra of CdTe NCs solution 30 min after addition of  $1.2 \times 10^{-7}$  M Eu(III); (D) Fluorescence intensity spectra of CdTe/Eu complex 10 min after addition of  $2.0 \times 10^{-7}$  M PPI.

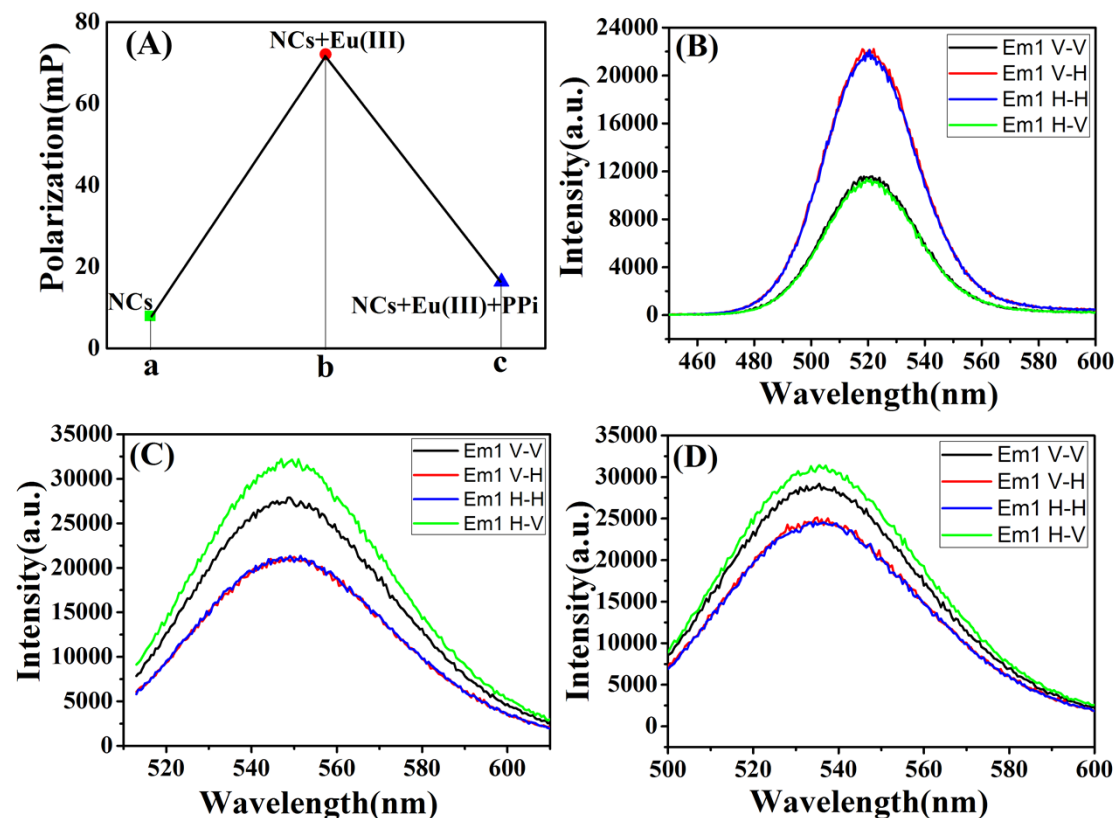

**Fig. S2** (A) TEM image of directly synthesized of CdTe NRs. (B) TEM image of (A) 30 min after addition of  $2.0 \times 10^{-7}$  M PPI.

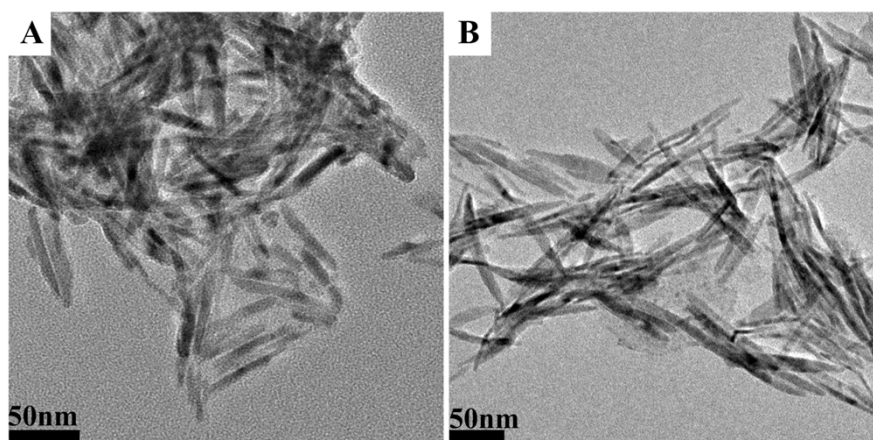

Table S1 Anisotropy decay parameters for CdTe/Eu(III)/PPi complex

| <i>Sample</i> | $\tau(ns)$ | $r_0$  | $\theta(ns)$ |
|---------------|------------|--------|--------------|
| CdTe          | 0.483      | 0.0235 | 0.261        |
| CdTe/Eu       | 0.534      | 0.115  | 0.557        |
| CdTe/Eu/PPi   | 0.773      | 0.0389 | 0.360        |

**Fig. S3** Changes in the fluorescence emission of CdTe NCs upon addition of  $0 - 8.0 \times 10^{-8}$  M Eu(III) in the present of (A) 0 M; (B)  $5.0 \times 10^{-8}$  M; (C)  $1.0 \times 10^{-7}$  M PPi; (D) Stern-Volmer plot of (A), (B) and (C); (E) Changes in the fluorescence emission of CdTe NCs on addition of 0.2 – 10.0  $\mu$ M PPi in the presence of  $8.0 \times 10^{-8}$  M Eu(III). (F) Stern-Volmer plot of (E).

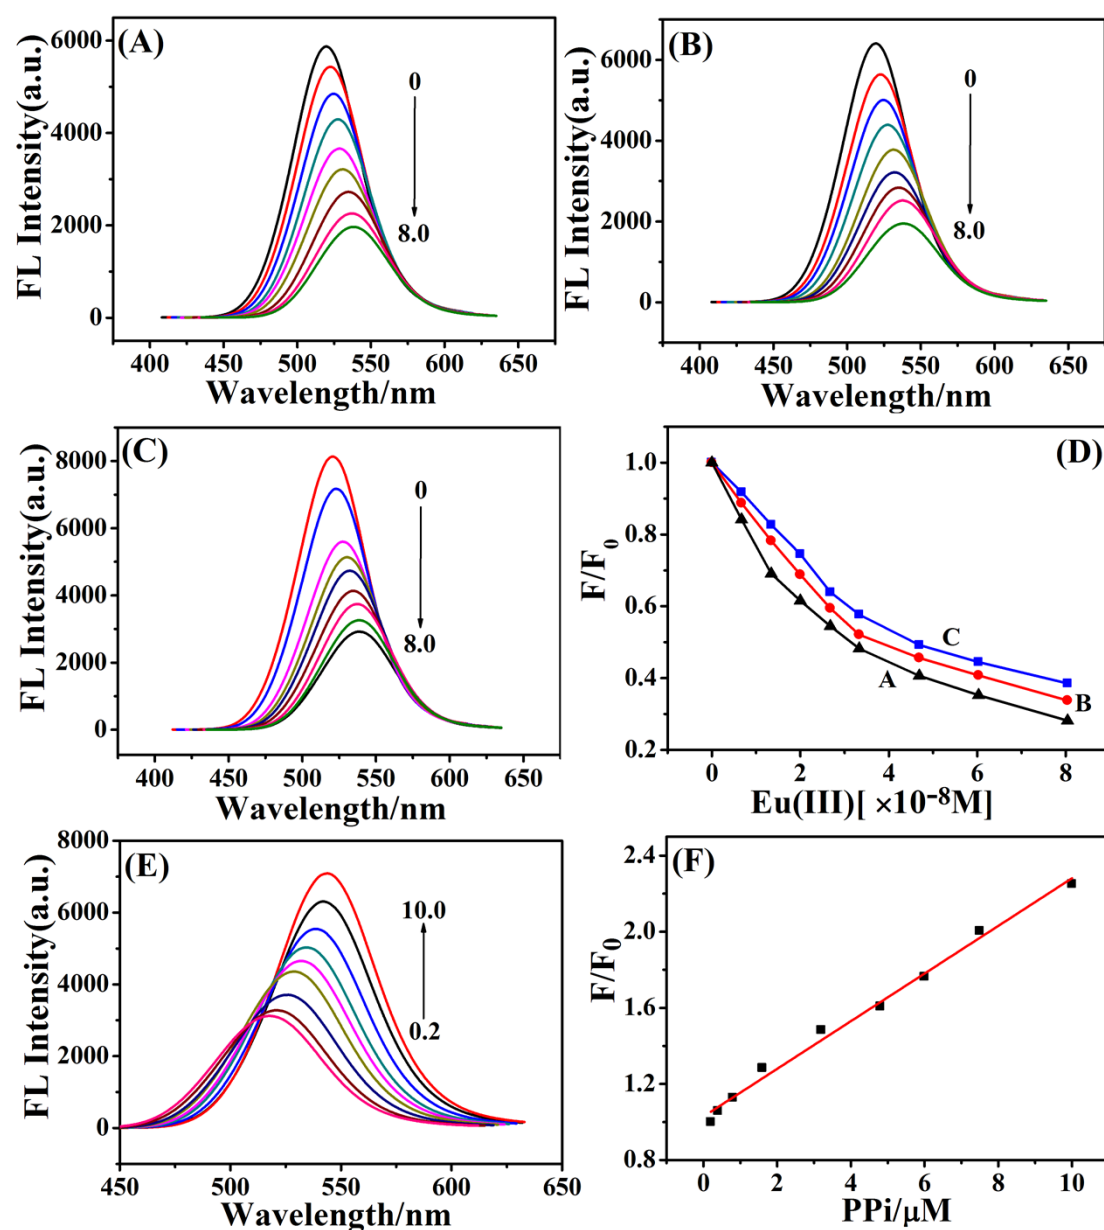

**Fig. S4** The FP of CdTe NCs changed as a function of time in the presence of  $1.2 \times 10^{-7}$  M Eu(III) ions.

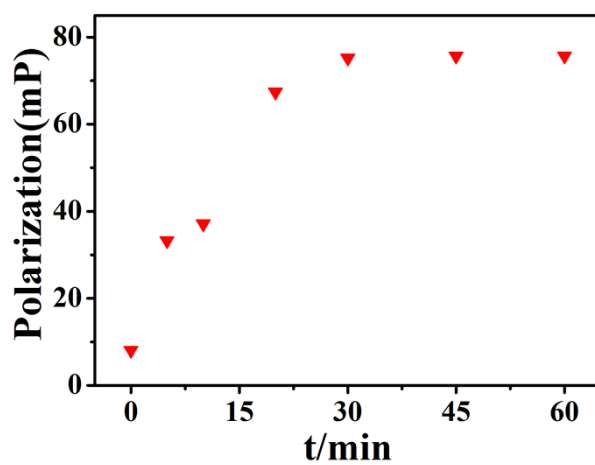

**Fig. S5** The FP of CdTe NCs changed as a function of time in the presence of  $1.2 \times 10^{-7}$  M Eu(III) ions and  $2.0 \times 10^{-7}$  M PPI.

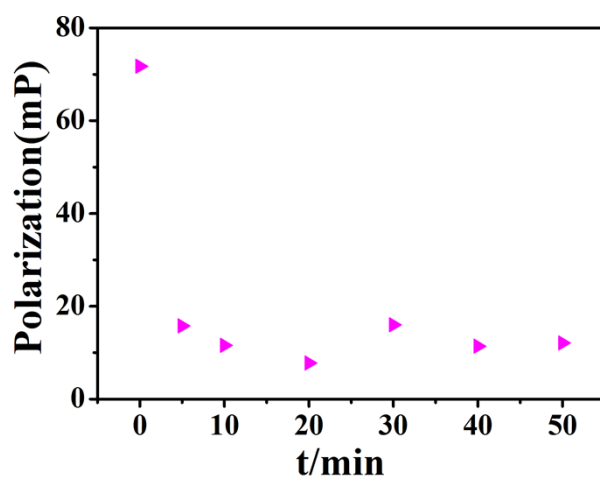

**Fig. S6** The FP of CdTe NCs changed as a function of time in the presence of  $1.2 \times 10^{-7}$  M Eu(III) ions,  $2.0 \times 10^{-7}$  M PPI and PAM.

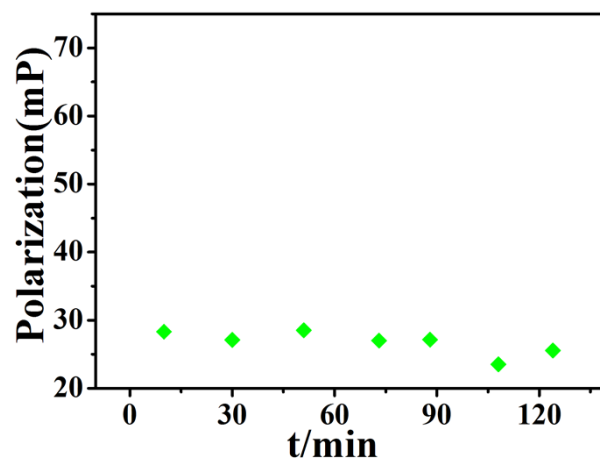

**Table S2** Comparison of PPi detection methods

| <i>Analytical Methods</i>                    | <i>Analytical ranges and LOD</i>                                      | <i>Ref.</i> |
|----------------------------------------------|-----------------------------------------------------------------------|-------------|
| FP method                                    | $2.0 \times 10^{-5}$ M - $1.0 \times 10^{-9}$ M/0.8nM                 | This work   |
| colorimetric method                          | 20-180nM/0.8nM                                                        | 1           |
| fluorescence method                          | $1.0 \times 10^{-6}$ - $5.0 \times 10^{-4}$ M/ $4.0 \times 10^{-7}$ M | 2           |
| ensemble analytical method                   | 112-278ppb/112ppb                                                     | 3           |
| electrogenerated<br>chemiluminescence method | 6.6-13.3 $\mu$ M/ 4.0 $\mu$ M                                         | 4           |

**References:**

1. J. Deng, P. Yu, L. Yang and L. Mao, *Anal. Chem.*, 2013, **85**, 2516-2522.
2. N. Shao, H. Wang, X. Gao, R. Yang and W. Chan, *Anal. Chem.*, 2010, **82**, 4628-4636.
3. S. Bhowmik, B. N. Ghosh, V. Marjomäki and K. T. Rissanen, *J. Am. Chem. Soc.*, 2014, DOI: 10.1021/ja4128949.
4. C. R. Lohani, J.-M. Kim, S.-Y. Chung, J. Yoon and K.-H. Lee, *Analyst*, 2010, **135**, 2079-2084.
